# Supplementary material for: Levothyroxine treatment and pregnancy outcomes in women with subclinical hypothyroidism: a systematic review and meta-analysis
Source: Springer Nature journal article supplement (doi:10.1007/s00404-019-05245-2), 2019-08-10
Supplement: MOESM1 [file 17056202]

**Supplementary file**

**Supplementary table 1: Quality assessment of included studies using CONSORT 2010 checklist of information for reporting a randomized trial Studies**

| **Author** | **Methods** | | | | | | | | | | | | | | | | |
| --- | --- | --- | --- | --- | --- | --- | --- | --- | --- | --- | --- | --- | --- | --- | --- | --- | --- |
| **Trial design** | | **Participants** | | **Interventions** | **Outcomes** | | **Sample size** | | **Randomization** | | **Allocation concealment mechanism** | **Implementation** | **Blinding** | | **Statistical methods** | |
| **a** | **b** | **a** | **b** | **a** | **b** | **a** | **b** | **Sequence** | **generation** | **a** | **b** | **a** | **b** |
| **Abdel Rahman et al., 2010** | **0** | **-** | **1** | **1** | **1** | **0** | **-** | **0** | **0** | **0** | **0** | **0** | **0** | **1** | **-** | **1** | **0** |
| **Casey et al. , 2017** | **1** | **-** | **1** | **1** | **1** | **1** | **-** | **1** | **1** | **1** | **1** | **0** | **0** | **1** | **-** | **1** | **1** |
| **Ju et al., 2016** | **0** | **-** | **1** | **1** | **1** | **0** | **-** | **0** | **0** | **0** | **0** | **0** | **0** | **1** | **-** | **1** | **1** |
| **Kim et al., 2011** | **0** | **-** | **1** | **1** | **1** | **1** | **-** | **0** | **0** | **1** | **0** | **0** | **0** | **1** | **-** | **1** | **0** |
| **Nazarpour et al., 2017** | **0** | **-** | **1** | **1** | **1** | **1** | **-** | **1** | **1** | **1** | **1** | **1** | **1** | **1** | **-** | **1** | **1** |
| **Nazarpour et al., 2018** | **0** | **-** | **1** | **1** | **1** | **1** | **-** | **1** | **1** | **1** | **1** | **1** | **1** | **1** | **-** | **1** | **1** |

| **Author** | **Results** | | | | | | | | | | **Total** | **Score**  **%** | **quality** |
| --- | --- | --- | --- | --- | --- | --- | --- | --- | --- | --- | --- | --- | --- |
| **Participant flow (a diagram is strongly recommended)** | | **Recruitment** | | **Baseline data** | **Numbers analyzed** | **Outcomes and estimation** | | **Ancillary analyses** | **Harms** |
| **a** | **b** | **a** | **b** |  |  | **a** | **b** |  |  |
| **Abdel Rahman et al., 2010** | **1** | **1** | **1** | **0** | **1** | **1** | **1** | **-** | **0** | **0** | **11/23** | **47.83** | **2** |
| **Casey et al. , 2017** | **1** | **1** | **1** | **0** | **1** | **1** | **1** | **-** | **0** | **0** | **18/23** | **78.26** | **1** |
| **Ju et al., 2016** | **1** | **0** | **1** | **0** | **1** | **1** | **1** | **-** | **1** | **0** | **12/22** | **54.55** | **2** |
| **Kim et al., 2011** | **1** | **-** | **1** | **0** | **1** | **1** | **1** | **-** | **1** | **0** | **13/22** | **59.09** | **2** |
| **Nazarpour et al., 2017** | **1** | **1** | **1** | **1** | **1** | **1** | **1** | **-** | **1** | **0** | **21/23** | **91.3** | **1** |
| **Nazarpour et al., 2018** | **1** | **1** | **1** | **0** | **1** | **1** | **1** | **-** | **1** | **0** | **20/23** | **87.0** | **1** |

**1: >70% good quality 2: 40-70% fair quality 3: < 40% poor quality**

**Supplementary table 2: Quality assessment of included studies using the Newcastle-Ottawa Quality Assessment Form for Cohort Studies**

| **Author** | **SELECTION** | | | | **COMPARABILITY** | **Outcome** | | | **Total scores** | **quality** |
| --- | --- | --- | --- | --- | --- | --- | --- | --- | --- | --- |
| **Representativeness of the exposed cohort** | **Selection of the non-exposed cohort** | **Ascertainment of exposure** | **Demonstration that outcome of interest was not present at start of study** | **Comparability of cohorts on the basis of the design or analysis controlled for confounders** | **Assessment of outcome** | **Was follow-up long enough for outcomes to occur** | **Adequacy of follow-up of cohorts** |
| **Bernardi et al., 2013** | **1** | **1** | **1** | **1** | **0** | **1** | **1** | **1** | **7** | **good** |
| **Blumenthal and Eastman, 2017** | **1** | **0** | **1** | **1** | **0** | **1** | **1** | **1** | **6** | **fair** |
| **Cai et al., 2017** | **1** | **0** | **1** | **1** | **0** | **1** | **1** | **1** | **6** | **fair** |
| **Maraka et al., 2017** | **1** | **1** | **1** | **1** | **2** | **1** | **1** | **1** | **9** | **good** |
| **Maraka et al., 2016** | **1** | **1** | **1** | **1** | **2** | **1** | **1** | **1** | **9** | **good** |
| **Al-Anbari, 2017** | **1** | **1** | **1** | **1** | **0** | **1** | **1** | **1** | **7** | **good** |
| **Wang et al, 2012** | **1** | **1** | **1** | **1** | **0** | **1** | **1** | **1** | **7** | **good** |

**1: 7-9 good quality, 2: 4-6 fair quality, 3: 0-3 poor quality**

**A**

| **type** | **Authors, years** | **Was selection of exposed and non‐exposed cohorts drawn from the same population?** | **Can we be confident in the assessment of exposure?** | **Can we be confident that the outcome of interest was not present at start of study?** | **Did the study match exposed and unexposed for all variables that are associated with the outcome of interest or did the statistical analysis adjust for these prognostic variables?** | **Can we be confident in the assessment of the presence or absence of prognostic factors?** | **Can we be confident in the assessment of outcome?** | **Was the follow up of cohorts adequate?** |
| --- | --- | --- | --- | --- | --- | --- | --- | --- |
| **Cohort** | **Bernardi et al., 2013** |  |  |  |  |  |  |  |
| **Blumenthal and Eastman, 2017** |  |  |  |  |  |  |  |
| **Cai et al., 2017** |  |  |  |  |  |  |  |
| **Maraka et al., 2017** |  |  |  |  |  |  |  |
| **Maraka et al., 2017** |  |  |  |  |  |  |  |
| **Al-Anbari, 2017** |  |  |  | 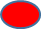 |  |  |  |
| **Wang et al, 2012** |  |  |  | 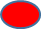 |  |  |  |

Definitely No (low risk of bias) Probably no Definitely yes (high risk of bias) Probably Yes

**B**

**Supplementary figure 1: Risk of bias in Cohort studies**

**A**

| **RCT** |  | **Random sequence generation (selection bias)** | **Allocation concealment (Selection bias: Biased allocation to comparison groups)** | **Blinding of participants and personnel (performance bias)** | **Blinding of outcome assessment (detection bias) all outcomes** | **Incomplete outcome data (attrition bias) all outcomes** | **Selective reporting (reporting bias)** |
| --- | --- | --- | --- | --- | --- | --- | --- |
| **Abdel Rahman et al., 2010** |  |  |  |  |  |  |
| **Casey et al. , 2017** |  |  |  |  |  |  |
| **Ju et al., 2016** |  | 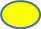 |  |  |  |  |
| **Kim et al., 2011** |  |  |  |  |  |  |
| **Nazarpour et al., 2017** |  |  |  |  |  |  |
| **Nazarpour et al., 2018** |  |  |  |  |  |  |

Yes (high risk of bias) Unclear No (low risk of bias)

**B**

**Supplementary figure 2: Risk of bias in RCT studies**

**Sensitivity analysis for TPOAb**

**Supplementary figure 3: Forest plot for abortion in the placebo control group obtained from sensitivity analysis**

**Supplementary table 3: Effect of omitting studies on estimated pooled odds ratio for abortion in placebo control group; results of sensitivity analysis**

------------------------------------------------------------------------------

Study omitted | Estimate [95% Conf. Interval]

-------------------+----------------------------------------------------------

Wang et al., 2012 | .34961066 .1500846 .81439143

Abdel Rahman et al., 2010|.32122907 .13558118 .76107991

Nazarpour et al., 2017|.3176589 .14033812 .71902895

Al.Anbari, 2017 | .31860751 .1406468 .72174227

Kim et al., 2011 | .62081528 .27107823 1.4217726

-------------------+----------------------------------------------------------

Combined | .36795136 .17519753 .77277462

**Supplementary figure 4: Forest plot for abortion in the euthyroid control group obtained from sensitivity analysis**

**Supplementary table 4: Effect of omitting studies on estimated pooled odds ratio for abortion in euthyroid control group; results of sensitivity analysis**

------------------------------------------------------------------------------

Study omitted | Estimate [95% Conf. Interval]

-------------------+----------------------------------------------------------

Cai et al., 2017 | 1.1184078 .34856164 3.5885651

Nazarpour et al., 2017| .99242985 .52841973 1.8638914

Al.Anbari, 2017 | .98762494 .53866851 1.8107668

-------------------+----------------------------------------------------------

Combined | 1.0045113 .56280221 1.7928907

**Supplementary figure 5: Forest plot for preterm in the placebo control group obtained from sensitivity analysis**

**Supplementary table 5: Effect of omitting studies on estimated pooled odds ratio for preterm in placebo control group; results of sensitivity analysis**

------------------------------------------------------------------------------

Study omitted | Estimate [95% Conf. Interval]

-------------------+----------------------------------------------------------

Maraka et al., 2017| .72436732 .5293715 .99119049

Casey et al., 2017| 1.0185934 .81492013 1.2731707

Nazarpour et al., 2017|1.0431844 .8374939 1.2993928

Nazarpour et al., 2018|1.0335495 .82204825 1.2994671

Casey et al., 2017| 1.061516 .83553529 1.3486161

Maraka et al., 2016| 1.0605129 .84905016 1.3246422

Wang et al., 2012 | 1.0234271 .82312232 1.2724755

Ju et al., 2016 | 1.0227544 .81919014 1.2769033

-------------------+----------------------------------------------------------

Combined | 1.0111376 .81403169 1.25597

-----------------------------------------------------------------------------

**Supplementary figure 6: Forest plot for preterm in the euthyroid control group obtained from sensitivity analysis**

**Supplementary table 6: Effect of omitting studies on estimated pooled odds ratio for preterm in euthyroid control group; results of sensitivity analysis**

------------------------------------------------------------------------------

Study omitted | Estimate [95% Conf. Interval]

-------------------+----------------------------------------------------------

Blumenthal and Eastman, 2017|1.77513161.0746076 2.9323189

Nazarpour et al., 2018|1.3968127 .58975303 3.3083096

Nazarpour et al., 2017|1.9947636 1.1968365 3.3246663

-------------------+----------------------------------------------------------

Combined | 1.7948055 1.1261001 2.8606042

------------------------------------------------------------------------------

**Supplementary figure 7: Forest plot for live birth rate in the placebo control group obtained from sensitivity analysis**

**Supplementary table 7: Effect of omitting studies on estimated pooled odds ratio for live birth rate in placebo control group; results of sensitivity analysis**

------------------------------------------------------------------------------

Study omitted | Estimate [95% Conf. Interval]

-------------------+----------------------------------------------------------

Al.Anbari, 2017 | 2.3310044 1.0213782 5.3198524

Kim et al., 2011 | 2.4060078 1.0940157 5.291399

Bernardi et al., 2013|3.3566449 1.6244005 6.9361367

-------------------+----------------------------------------------------------

Combined | 2.7163489 1.4435202 5.1114986

------------------------------------------------------------------------------

**Supplementary figure 8: Forest plot for live birth rate in the euthyroid control group obtained from sensitivity analysis**

**Supplementary table 8: Effect of omitting studies on estimated pooled odds ratio for live birth rate in euthyroid control group; results of sensitivity analysis**

------------------------------------------------------------------------------

Study omitted | Estimate [95% Conf. Interval]

-------------------+----------------------------------------------------------

Al.Anbari, 2017 | .86401099 .3318767 2.2493746

Bernardi et al., 2013|.90595609 .43948048 1.8675607

-------------------+----------------------------------------------------------

Combined | .89071856 .49988957 1.5871096

------------------------------------------------------------------------------

**Supplementary figure 9: Forest plot for NICU admission in the placebo control group obtained from sensitivity analysis**

**Supplementary table 9: Effect of omitting studies on estimated pooled odds ratio for NICU admission in placebo control group; results of sensitivity analysis**

------------------------------------------------------------------------------

Study omitted | Estimate [95% Conf. Interval]

-------------------+----------------------------------------------------------

Nazarpour et al., 2018|.50645995 .12048583 2.128895

Nazarpour et al., 2017|.58087617 .27532607 1.2255182

-------------------+----------------------------------------------------------

Combined | .56288658 .29031924 1.0913548

------------------------------------------------------------------------------

**Supplementary figure 10: Forest plot for NICU admission in the euthyroid control group obtained from sensitivity analysis**

**Supplementary table 10: Effect of omitting studies on estimated pooled odds ratio for NICU admission in euthyroid control group; results of sensitivity analysis**

------------------------------------------------------------------------------

Study omitted | Estimate [95% Conf. Interval]

-------------------+----------------------------------------------------------

Maraka et al., 2016| 1.0899483 .68203843 1.7418185

Casey et al., 2017| .66275322 .32059598 1.3700789

Nazarpour et al., 2017|1.1722784 .73352951 1.8734579

Nazarpour et al., 2018|1.0900807 .66060042 1.7987819

-------------------+----------------------------------------------------------

Combined | 1.0432152 .66823906 1.6286057

------------------------------------------------------------------------------

**Supplementary table 11: Results of Meta Regression analysis based on TSH-cut off**

| **Outcome** | **Control Group** | ***Regression coef.** | **LCI** | **UCI** | **P-value** |
| --- | --- | --- | --- | --- | --- |
| Abortion | Placebo | 0.71 | 0.0463486 | 11.13859 | 0.756 |
| Euthyroid | 0.94 | 0.0001511 | 5856.829 | 0.999 |
| Preterm+ Preterm <34w | Placebo | 0.87 | 0.4783564 | 1.577105 | 0.564 |
| Euthyroid | a-- | -- | -- | -- |
| Live birth rate | Placebo | 1.2 | 0.0002074 | 6617.763 | 0.856 |
| Euthyroid | -- | -- | -- | -- |
| Neonatal/ NICU admission | Placebo | 1.4 | 0.1746645 | 10.83761 | 0.574 |
| Euthyroid | -- | -- | -- | -- |
| Pregnancy Loss | Placebo | 0.76 | 0.2583924 | 2.235127 | 0.567 |
| Euthyroid | 0.98 | 0.3345977 | 2.922678 | 0.987 |
| Adverse maternal complication | Placebo | 0.8 | 0.5674296 | 1.128456 | 0.183 |
| Euthyroid | -- | -- | -- | -- |
| Obstetrical hemorrhage | Placebo | 0.90 | 0.2154672 | 3.753027 | 0.982 |
| Euthyroid | -- | -- | -- | -- |
| Preterm/LBW/ oligohydramnios | Placebo | 0.86 | 0.6386666 | 1.167738 | 0.329 |
| Euthyroid | -- | -- | -- | -- |
| Adverse neonatal complication | Placebo | 1.06 | 0.6278684 | 1.793332 | 0.867 |
| Euthyroid | -- | -- | -- | -- |

*It showed the ratio of OR in TSH>2.5 vs. TSH=2.5, a Insufficient observation to run the analysis

**Supplementary table 12: Results of Meta Regression analysis based on initiation of treatment (Before pregnancy and during pregnancy)**

| Outcome | Control Group | *Regression coef. | LCI | UCI | P-value |
| --- | --- | --- | --- | --- | --- |
| Abortion | Placebo | 0.9565644 | 0.1329768 | 6.881016 | 0.947 |
| Euthyroid | 0.9322504 | 0.0000913 | 9524.056 | 0.939 |
| Preterm+ Preterm <34w | Placebo | -- | -- | -- | -- |
| Euthyroid | -- | -- | -- | -- |
| Live birth rate | Placebo | -- | -- | -- | -- |
| Euthyroid | -- | -- | -- | -- |
| Neonatal/ NICU admission | Placebo | -- | -- | -- | -- |
| Euthyroid | -- | -- | -- | -- |
| Pregnancy Loss | Placebo | 0.9365279 | 0.4192428 | 2.092068 | 0.855 |
| Euthyroid | 0.8486679 | 0.2655206 | 2.712548 | 0.741 |
| Adverse maternal complication | Placebo | -- | -- | -- | -- |
| Euthyroid | -- | -- | -- | -- |
| Obstetrical hemorrhage | Placebo | -- | -- | -- | -- |
| Euthyroid | -- | -- | -- | -- |
| Preterm/LBW/ oligohydramnios | Placebo | -- | -- | -- | -- |
| Euthyroid | -- | -- | -- | -- |
| Adverse neonatal complication | Placebo | -- | -- | -- | -- |
| Euthyroid | -- | -- | -- | -- |

*It showed the ratio of OR in subgroup of Initiation of treatment (Before pregnancy versus during pregnancy)

, a Insufficient observation to run the analysis or all studies had the same group variable.
